# Supplementary material for: Epigenetic age-predictor for mice based on three CpG sites
Source: eLife journal article supplement (doi:10.7554/elife.37462), 2018-08-24
Supplement: supp [file elife-37462-supp-v1.zip]

Archive with 6 entries (6 files):
- elife_poa_e37462_Supplementary_File_3.docx
- elife_poa_e37462_Source_data_1.xlsx
- elife_poa_e37462_Supplementary_File_2.docx
- elife_poa_e37462_Figure_1_figure_supplement_1.tif
- elife_poa_e37462_Supplementary_File_1.docx
- elife_poa_e37462_Transparent_Reporting_File.pdf
