# Supplementary material for: Epigenetic age-predictor for mice based on three CpG sites
Source: eLife journal article supplement (doi:10.7554/elife.37462), 2018-08-24
Supplement: supp [file elife-37462-supp-v1.zip › elife_poa_e37462_Source_data_1.xlsx]

## Sheet: sheet 1
Additional files: Pyrosequencing raw data of mouse epigenetic aging predictor
Sample sets	ID	Prima1 methylation (%)	Hsf4 methylation (%)	Kcns1 methylation (%)	Predicted age (Week)	Real age(Week)	Mouse strain
Training set	1	49.76	41.64	31.66	121.533	117	C57BL/6J
	2	50.62	35.6	36.91	108.462	117	C57BL/6J
	3	43.6	32.95	24.33	85.7734	87	C57BL/6J
	4	54.57	33.12	26.56	90.8922	92	C57BL/6J
	5	65.25	31.18	20.21	80.5362	84	C57BL/6J
	6	49.02	31.75	21.59	80.351	84	C57BL/6J
	7	59.39	27.74	22.54	71.0869	71	C57BL/6J
	8	64.23	23.89	16.28	53.6994	71	C57BL/6J
	9	61.49	28.53	21.59	72.9842	61	C57BL/6J
	10	60.21	24.33	25.45	63.7214	61	C57BL/6J
	11	51.99	24.18	18.21	54.048	54	C57BL/6J
	12	70.75	19.86	18.16	44.5352	54	C57BL/6J
	13	68.76	20.22	22.11	49.3259	45	C57BL/6J
	14	77.18	21.31	19.93	52.1928	45	C57BL/6J
	15	59.79	20.92	18.37	45.7511	39	C57BL/6J
	16	69.76	19.58	13.64	38.7815	39	C57BL/6J
	17	75.74	16.06	12.66	28.1208	30	C57BL/6J
	18	66.41	20.45	15.83	43.0442	30	C57BL/6J
	19	86.72	11.24	11.73	14.5304	18	C57BL/6J
	20	74.23	15.56	9.17	22.645	18	C57BL/6J
	21	81.5	13.17	11.86	19.5498	18	C57BL/6J
	22	78.83	10.36	9.56	7.91822	11	C57BL/6J
	23	81.42	9.69	9.23	6.0426	11	C57BL/6J
	24	74.11	12.04	9.89	12.4753	11	C57BL/6J
Vaslidation set 1	1	43.88	37.09	25.09	99.4274	104	C57BL/6J
	2	33.95	30.84	28.94	82.0116	73	C57BL/6J
	3	65.28	29.78	26.36	82.5806	65	C57BL/6J
	4	47.15	29.09	28.54	78.9303	65	C57BL/6J
	5	75.65	20.09	13.38	41.316	32	C57BL/6J
	6	73.41	17.95	14.06	34.9332	32	C57BL/6J
	7	77.59	9.19	11.77	6.32923	7	C57BL/6J
	8	79.02	8.3	12.44	4.56725	7	C57BL/6J
	9	83.51	8.92	9.28	4.14711	7	C57BL/6J
	10	85.1	10.02	10.92	9.57983	7	C57BL/6J
	11	87.9	13.33	12.03	21.5529	10	C57BL/6J
	12	75.34	9.32	11.32	5.79708	10	C57BL/6J
	13	71.01	20.76	17.19	46.3692	43	C57BL/6J
	14	71.6	24.08	17.79	57.385	44	C57BL/6J
	15	59.48	23.17	19.43	53.7456	44	C57BL/6J
	16	67.93	20.95	14.99	44.0374	39	C57BL/6J
	17	65.48	24.39	19.27	58.6032	39	C57BL/6J
	18	75.7	14.74	10.46	21.75	23	C57BL/6J
	19	75.05	16.61	11.74	28.7259	23	C57BL/6J
	20	76.96	12.07	10.12	13.3995	14	C57BL/6J
	21	86.47	13.14	10.42	18.9999	14	C57BL/6J
Validation set 2	1	53.98	33.93	30.04	96.8797	109	C57BL/6J
	2	41.8	34.61	34.39	100.954	104	C57BL/6J
	3	66.23	33.77	29.98	98.8721	103	C57BL/6J
	4	58.07	28.5	29.74	80.6206	92	C57BL/6J
	5	66.29	30.51	32.43	91.3361	89	C57BL/6J
	6	57.03	26.39	17.36	61.054	70	C57BL/6J
	7	75.43	25.35	23.87	68.4084	68	C57BL/6J
	8	69.6	25.37	20.7	63.9737	67	C57BL/6J
	9	72.71	28.83	20.76	75.3879	57	C57BL/6J
	10	68.54	24.21	17.76	57.1193	51	C57BL/6J
	11	67.95	20.43	16.59	44.0899	44	C57BL/6J
	12	73.07	22.18	20.09	54.1948	39	C57BL/6J
	13	78.18	22.55	12.17	48.2002	47	C57BL/6J
	14	84.49	21.01	16.71	49.4511	34	C57BL/6J
	15	69.36	28.25	27.39	79.763	92	C57BL/6J
	16	55.37	30.96	21.79	79.4357	68	C57BL/6J
	17	87.92	13.72	7.73	18.3101	17	C57BL/6J
	18	85.18	13.32	13.92	22.9133	17	C57BL/6J
	19	91.19	11.79	6.77	12.0253	14	C57BL/6J
DBA/2J mice	1	49.05	46.31	39.77	144.233	79	DBA/2J
	2	50.31	48.46	43	154.492	79	DBA/2J
	3	77.81	24.65	26.49	69.4516	25	DBA/2J
	4	77.87	29.46	23.21	80.9484	25	DBA/2J
	5	79.39	12.04	18.21	22.1913	7	DBA/2J
	6	81.3	12.96	15.36	22.4834	7	DBA/2J
	d1	32.9	43.35	40.35	132.315	109	DBA/2J
	d2	48.78	52.7	46.22	170.627	106	DBA/2J
	d3	37.92	36.43	32.12	103.426	106	DBA/2J
	d4	37.44	41.17	37.06	123.107	106	DBA/2J
	d5	50.98	49.75	46.15	161.885	106	DBA/2J
	d6	38.24	50.46	41.98	157.111	105	DBA/2J
	d7	50	44.69	48.62	148.585	104	DBA/2J
	d8	35.71	51.87	51.62	170.931	103	DBA/2J
	d9	35.21	41.14	35.29	120.717	103	DBA/2J
	d10	48.15	41.13	34.29	122.344	99	DBA/2J
	d11	39.89	45.12	34.73	133.425	85	DBA/2J
	d12	32.54	42.49	47.15	136.622	99	DBA/2J
	d13	37.48	48.69	46.61	156.272	95	DBA/2J
	d14	43.01	42.94	51.77	144.978	94	DBA/2J
	d15	31.59	49.87	43.56	155.538	90	DBA/2J
	d16	49.58	39.01	39.53	121.51	85	DBA/2J
	d17	50.21	38.34	35.18	115.062	75	DBA/2J
	d18	46.28	34.9	31.38	99.666	75	DBA/2J
	d19	49.95	41.4	29.84	118.945	88	DBA/2J
	D1	78.69	22.85	17.81	55.1	17	DBA/2J
	D2	81.59	23.1	17.62	56.3	17	DBA/2J
	D3	82.84	20.36	19.09	49.6	13	DBA/2J
	D4	80.18	19.09	17.06	43	13	DBA/2J
	D5	75.74	18.46	16.97	40	13	DBA/2J
	D6	80.21	17.82	15.58	37.5	10	DBA/2J
	D7	77.02	15.94	15.7	31.2	10	DBA/2J
	D8	87.23	13.04	15.94	24.6	6	DBA/2J
