# Supplementary figures and images for: Epigenetic age-predictor for mice based on three CpG sites
Source: eLife journal article supplement (doi:10.7554/elife.37462), 2018-08-24

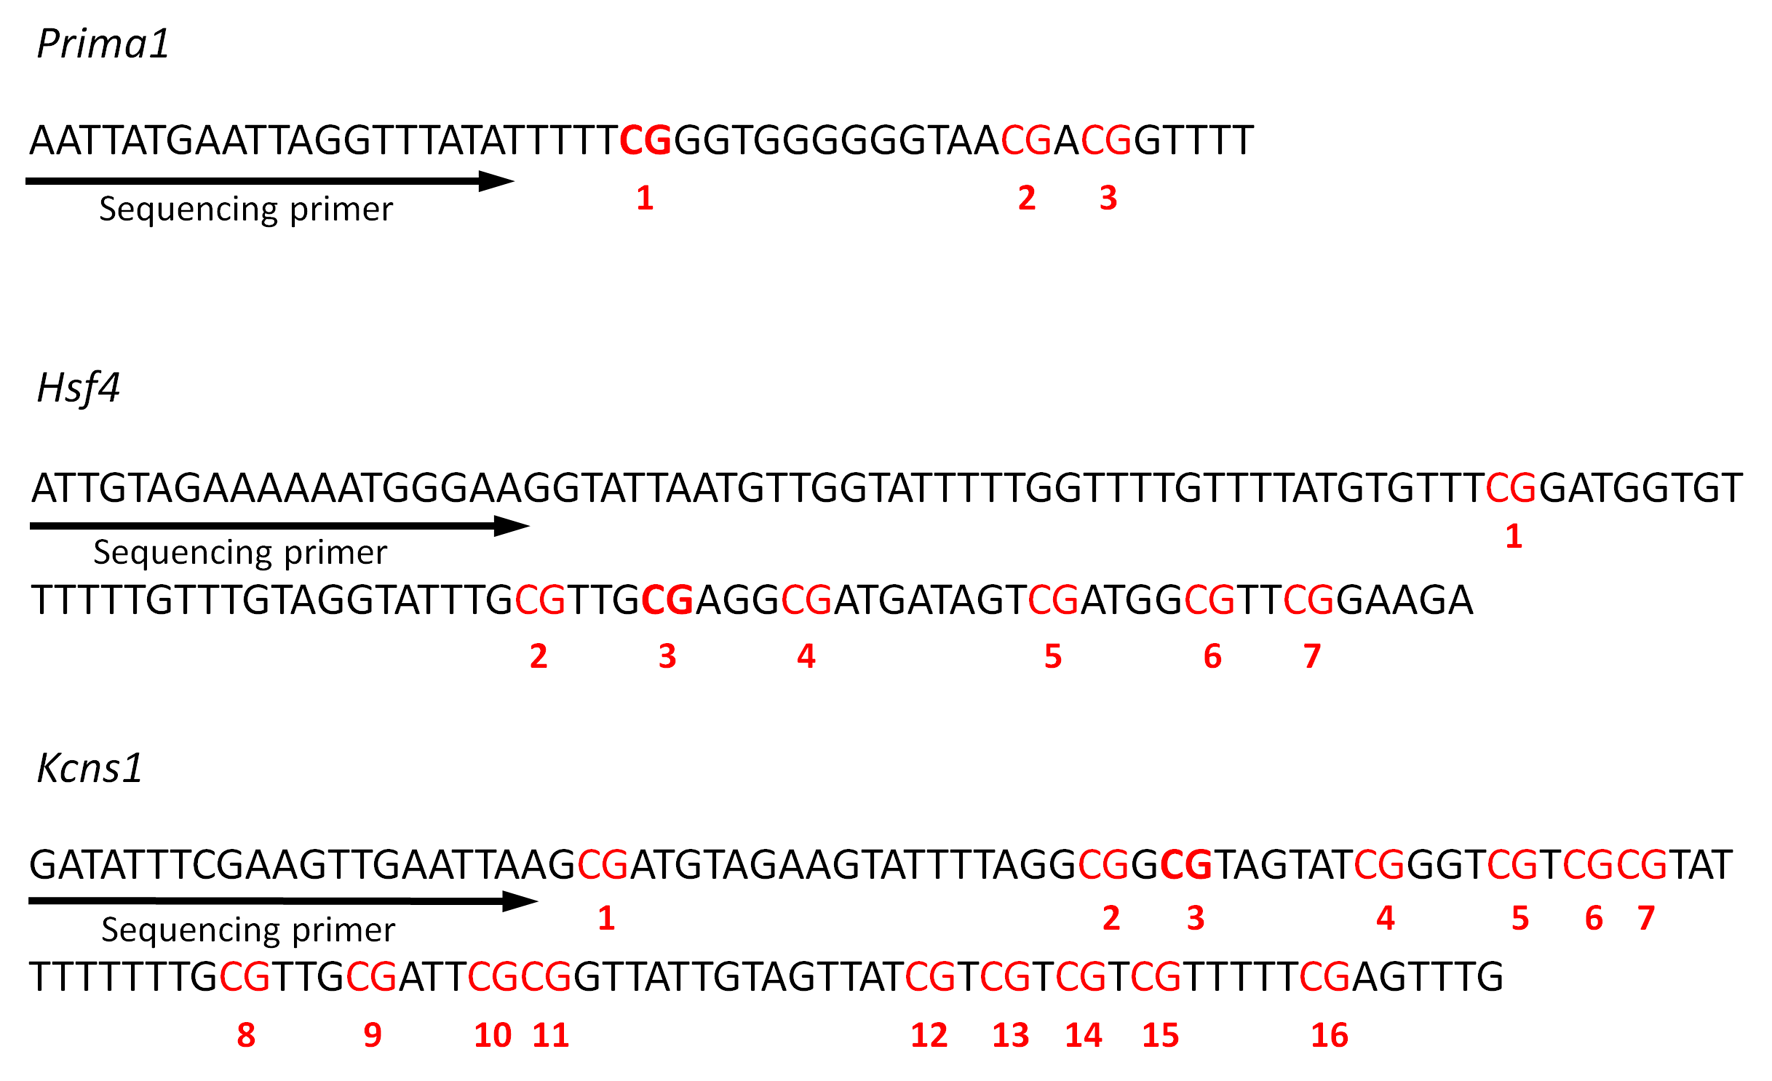

Supplement: supp [file elife-37462-supp-v1.zip › elife_poa_e37462_Figure_1_figure_supplement_1.tif]
